# Supplementary material for: Insights into Reston virus spillovers and adaption from virus whole genome sequences
Source: PubMed Central journal article supplement (PMC5444788; doi:10.1371/journal.pone.0178224), 2017-05-25
Supplement: pone.0178224.s003.pdf [file pone.0178224.s003.pdf]

| Isolate name            | Mapped reads | Consensus length <sup>(a)</sup> | Ambiguous <sup>(b)</sup><br>5'end // 3'end | Percentage of Ref. Seq. <sup>(c)</sup> | Average coverage |
|-------------------------|--------------|---------------------------------|--------------------------------------------|----------------------------------------|------------------|
| USA_PA_1989<br>(813159) | 2,652,487    | 18,891                          | N/A                                        | 100 %                                  | 20,342           |
| USA_VA_1989<br>(813168) | 215,727      | 18,881                          | 1 // 9                                     | > 99 %                                 | 1,659            |
| USA_VA_1989<br>(811952) | 382,376      | 18,883                          | 1 // 7                                     | > 99 %                                 | 2,934            |
| ITA_1992<br>(806679)    | 196,202      | 18,872                          | 12 // 7                                    | > 99 %                                 | 1,523            |
| PHL_1992<br>(806676)    | 48,983       | 18,875                          | 1 // 15                                    | > 99 %                                 | 361              |
| USA_TX_1996<br>(807334) | 119,814      | 18,879                          | 1 // 11                                    | > 99 %                                 | 887              |
| PHL_A_2008<br>(811411)  | 628,462      | 18,879                          | 1 // 7 <sup>(d)</sup>                      | > 99 %                                 | 4,729            |
| PHL_A_2008<br>(811412)  | 204,006      | 18,868                          | 8 // 11 <sup>(d)</sup>                     | > 99 %                                 | 1,514            |
| PHL_A_2009<br>(813161)  | 217,371      | 18,879                          | 1 // 7 <sup>(d)</sup>                      | > 99 %                                 | 1,635            |

<sup>(a)</sup> Non-ambiguous sequence

<sup>(b)</sup> Ambiguous or missing terminal nt

<sup>(c)</sup> Reference sequence: NC\_004161 is 18,891 nt long

<sup>(d)</sup> VP24 5' UTR is 4 nt shorter than NC\_004161
