# Supplementary material for: Insights into Reston virus spillovers and adaption from virus whole genome sequences
Source: PubMed Central journal article supplement (PMC5444788; doi:10.1371/journal.pone.0178224), 2017-05-25
Supplement: pone.0178224.s004.pdf [file pone.0178224.s004.pdf]

| Pass.No. | 1-A   |          |         | 1-B   |          |         | 1-C   |          |         |           |
|----------|-------|----------|---------|-------|----------|---------|-------|----------|---------|-----------|
| Position | Count | Coverage | Freq. % | Count | Coverage | Freq. % | Count | Coverage | Freq. % | Avg.      |
| 380      | 1984  | 8112     | 24      | 2603  | 9860     | 26      | 2092  | 8415     | 25      | <b>25</b> |
| 481      | 2096  | 8571     | 24      | 2688  | 10529    | 26      | 2217  | 8587     | 26      |           |
| 3055     | 1795  | 7017     | 26      | 2162  | 8269     | 26      | 1787  | 6602     | 27      |           |
| 4943     | 2719  | 11674    | 23      | 3397  | 13259    | 26      | 2478  | 9873     | 25      |           |
| 5708     | 2001  | 9536     | 21      | 2641  | 11224    | 24      | 1952  | 8230     | 24      |           |
| 5794     | 1246  | 5767     | 22      | 1666  | 7198     | 23      | 1271  | 5602     | 23      |           |
| 10228    | 2347  | 9849     | 24      | 3019  | 11747    | 26      | 2210  | 8831     | 25      |           |
| 12317    | 1212  | 4408     | 27      | 1607  | 5745     | 28      | 1348  | 4920     | 27      |           |
| 12641    | 997   | 3868     | 26      | 1403  | 5154     | 27      | 1204  | 4380     | 27      |           |
| 12902    | 2305  | 9184     | 25      | 3051  | 11142    | 27      | 2446  | 9319     | 26      |           |
| 13995    | 2080  | 9048     | 23      | 2839  | 11111    | 26      | 2068  | 8394     | 25      |           |
| 16677    | 2183  | 8390     | 26      | 2861  | 10280    | 28      | 2345  | 8377     | 28      |           |
| 18755    | 183   | 977      | 19      | 240   | 1154     | 21      | 215   | 915      | 23      |           |

| Pass.No. | 2-A   |          |         | 1-B   |          |         | 2-C   |          |         |           |
|----------|-------|----------|---------|-------|----------|---------|-------|----------|---------|-----------|
| Position | Count | Coverage | Freq. % | Count | Coverage | Freq. % | Count | Coverage | Freq. % | Avg.      |
| 380      | 1169  | 3997     | 29      | 1808  | 5723     | 32      | 5529  | 17672    | 31      | <b>31</b> |
| 481      | 1235  | 4216     | 29      | 1828  | 5763     | 32      | 5546  | 18119    | 31      |           |
| 3055     | 1010  | 3210     | 31      | 1429  | 4337     | 33      | 4348  | 14158    | 31      |           |
| 4943     | 2201  | 7725     | 28      | 2332  | 7327     | 32      | 6286  | 21157    | 30      |           |
| 5708     | 1145  | 4531     | 25      | 1487  | 5128     | 29      | 5415  | 19394    | 28      |           |
| 5794     | 595   | 2417     | 25      | 986   | 3383     | 29      | 3592  | 12653    | 28      |           |
| 10228    | 1526  | 5483     | 28      | 1723  | 5450     | 32      | 5767  | 19320    | 30      |           |
| 12317    | 563   | 1710     | 33      | 1155  | 3186     | 36      | 3140  | 9548     | 33      |           |
| 12641    | 533   | 1644     | 32      | 851   | 2515     | 34      | 3001  | 9038     | 33      |           |
| 12902    | 1454  | 4882     | 30      | 2018  | 6197     | 33      | 5421  | 17408    | 31      |           |
| 13995    | 1541  | 5383     | 29      | 1698  | 5668     | 30      | 4969  | 16991    | 29      |           |
| 16677    | 1269  | 4004     | 32      | 1999  | 5867     | 34      | 5331  | 16244    | 33      |           |
| 18755    | 74    | 254      | 29      | 134   | 383      | 35      | 678   | 2395     | 28      |           |

| Pass.No. | 3-A   |          |         | 3-B   |          |         | 3-C   |          |         |           |
|----------|-------|----------|---------|-------|----------|---------|-------|----------|---------|-----------|
| Position | Count | Coverage | Freq. % | Count | Coverage | Freq. % | Count | Coverage | Freq. % | Avg.      |
| 380      | 2834  | 8574     | 33      | 6737  | 19842    | 34      | 2739  | 8368     | 33      | <b>33</b> |
| 481      | 3011  | 9081     | 33      | 6988  | 20649    | 34      | 2756  | 8432     | 33      |           |
| 3055     | 1579  | 4758     | 33      | 3861  | 11127    | 35      | 1462  | 4404     | 33      |           |
| 4943     | 2089  | 6432     | 32      | 4930  | 14827    | 33      | 2059  | 6552     | 31      |           |
| 5708     | 2272  | 7944     | 29      | 5951  | 18985    | 31      | 2116  | 7105     | 30      |           |
| 5794     | 1534  | 5311     | 29      | 3980  | 12541    | 32      | 1432  | 4870     | 29      |           |
| 10228    | 2758  | 8736     | 32      | 6675  | 19667    | 34      | 2493  | 7994     | 31      |           |
| 12317    | 1460  | 4312     | 34      | 3514  | 9706     | 36      | 1386  | 3943     | 35      |           |
| 12641    | 1477  | 4195     | 35      | 3312  | 9128     | 36      | 1154  | 3298     | 35      |           |
| 12902    | 2473  | 7493     | 33      | 5722  | 15665    | 37      | 2369  | 7010     | 34      |           |
| 13995    | 2081  | 6621     | 31      | 5218  | 15036    | 35      | 1947  | 6013     | 32      |           |
| 16677    | 2596  | 7569     | 34      | 6052  | 16594    | 36      | 2632  | 7402     | 36      |           |
| 18755    | 530   | 1800     | 29      | 1292  | 3945     | 33      | 322   | 1045     | 31      |           |

| Pass.No. | 4-A   |          |         | 4-B   |          |         | 4-C   |          |         |           |
|----------|-------|----------|---------|-------|----------|---------|-------|----------|---------|-----------|
| Position | Count | Coverage | Freq. % | Count | Coverage | Freq. % | Count | Coverage | Freq. % | Avg.      |
| 380      | 5534  | 15180    | 36      | 6100  | 15108    | 40      | 8031  | 22780    | 35      | <b>37</b> |
| 481      | 5561  | 15189    | 37      | 5514  | 13850    | 40      | 7456  | 20746    | 36      |           |
| 3055     | 2751  | 7488     | 37      | 2694  | 6409     | 42      | 3583  | 9677     | 37      |           |
| 4943     | 3761  | 10755    | 35      | 4327  | 11150    | 39      | 5914  | 17270    | 34      |           |
| 5708     | 4023  | 12453    | 32      | 3509  | 9473     | 37      | 5816  | 18214    | 32      |           |
| 5794     | 2660  | 8097     | 33      | 2533  | 6837     | 37      | 3660  | 11673    | 31      |           |
| 10228    | 4238  | 12480    | 34      | 3793  | 9683     | 39      | 6408  | 18452    | 35      |           |
| 12317    | 2178  | 5759     | 38      | 2073  | 4823     | 43      | 2848  | 7348     | 39      |           |
| 12641    | 1925  | 4996     | 39      | 1909  | 4336     | 44      | 2512  | 6405     | 39      |           |
| 12902    | 3891  | 10324    | 38      | 4218  | 10000    | 42      | 5744  | 15387    | 37      |           |
| 13995    | 3019  | 8635     | 35      | 3177  | 7941     | 40      | 4397  | 12929    | 34      |           |
| 16677    | 3606  | 9472     | 38      | 4302  | 10086    | 43      | 5420  | 14141    | 38      |           |
| 18755    | 430   | 1296     | 33      | 626   | 1687     | 37      | 463   | 1539     | 30      |           |
